# Supplementary material for: A review of raptor carcass persistence trials and the practical implications for fatality estimation at wind farms
Source: PeerJ. 2022 Nov 15;10:e14163. doi: 10.7717/peerj.14163 (PMC9673768; doi:10.7717/peerj.14163)
Supplement: Supplemental Information 3 [file peerj-10-14163-s003.csv]

DateSearched	Turbine1	Turbine2	Turbine3	Turbine4	Turbine5	Turbine6	Turbine7	Turbine8	Turbine9	Turbine10	Turbine11	Turbine12
2020-01-01	1	1	1	1	1	1	1	1	1	1	1	1
2020-01-15	1	1	1	1	1	1	1	1	1	1	1	1
2020-01-29	1	1	1	1	1	1	1	1	1	1	1	1
2020-02-12	1	1	1	1	1	1	1	1	1	1	1	1
2020-02-26	1	1	1	1	1	1	1	1	1	1	1	1
2020-03-11	1	1	1	1	1	1	1	1	1	1	1	1
2020-03-25	1	1	1	1	1	1	1	1	1	1	1	1
2020-04-08	1	1	1	1	1	1	1	1	1	1	1	1
2020-04-22	1	1	1	1	1	1	1	1	1	1	1	1
2020-05-06	1	1	1	1	1	1	1	1	1	1	1	1
2020-05-20	1	1	1	1	1	1	1	1	1	1	1	1
2020-06-03	1	1	1	1	1	1	1	1	1	1	1	1
2020-06-17	1	1	1	1	1	1	1	1	1	1	1	1
2020-07-01	1	1	1	1	1	1	1	1	1	1	1	1
2020-07-15	1	1	1	1	1	1	1	1	1	1	1	1
2020-07-29	1	1	1	1	1	1	1	1	1	1	1	1
2020-08-12	1	1	1	1	1	1	1	1	1	1	1	1
2020-08-26	1	1	1	1	1	1	1	1	1	1	1	1
2020-09-09	1	1	1	1	1	1	1	1	1	1	1	1
2020-09-23	1	1	1	1	1	1	1	1	1	1	1	1
2020-10-07	1	1	1	1	1	1	1	1	1	1	1	1
2020-10-21	1	1	1	1	1	1	1	1	1	1	1	1
2020-11-04	1	1	1	1	1	1	1	1	1	1	1	1
2020-11-18	1	1	1	1	1	1	1	1	1	1	1	1
2020-12-02	1	1	1	1	1	1	1	1	1	1	1	1
2020-12-16	1	1	1	1	1	1	1	1	1	1	1	1
2020-12-30	1	1	1	1	1	1	1	1	1	1	1	1
