# Supplementary material for: A review of raptor carcass persistence trials and the practical implications for fatality estimation at wind farms
Source: PeerJ. 2022 Nov 15;10:e14163. doi: 10.7717/peerj.14163 (PMC9673768; doi:10.7717/peerj.14163)
Supplement: Supplemental Information 6 [file peerj-10-14163-s006.csv]

carcID	Trial	Turbine	Size	DateFound
x1	TopoftheWorld2021	Turbine1	Raptor	2020-01-01
x2	TopoftheWorld2021	Turbine2	Raptor	2020-02-26
x3	TopoftheWorld2021	Turbine3	Raptor	2020-03-25
x4	TopoftheWorld2021	Turbine4	Raptor	2020-04-22
x5	TopoftheWorld2021	Turbine5	Raptor	2020-05-20
x6	TopoftheWorld2021	Turbine6	Raptor	2020-06-17
x7	TopoftheWorld2021	Turbine7	Raptor	2020-07-15
x8	TopoftheWorld2021	Turbine8	Raptor	2020-08-12
x9	TopoftheWorld2021	Turbine9	Raptor	2020-09-09
x10	TopoftheWorld2021	Turbine10	Raptor	2020-10-07
x11	TopoftheWorld2021	Turbine11	Raptor	2020-11-04
x12	TopoftheWorld2021	Turbine12	Raptor	2020-12-02
